# Supplementary material for: MultilayerPy (v1.0): A Python-based framework for building, running and optimising kinetic multi-layer models of aerosols and films
Source: Copernicus journal article supplement (doi:10.5194/egusphere-2022-143), 2022-05-02
Supplement: Supplementary file 1 [file egusphere-2022-143-supplement.pdf]

## Supporting information for “MultilayerPy (v1.0): A Python-based framework for building, running and optimising kinetic multi-layer models of aerosols and films”

Adam Milsom, Amy Lees, Adam M. Squires and Christian Pfrang.

### S1. Parameter correlation

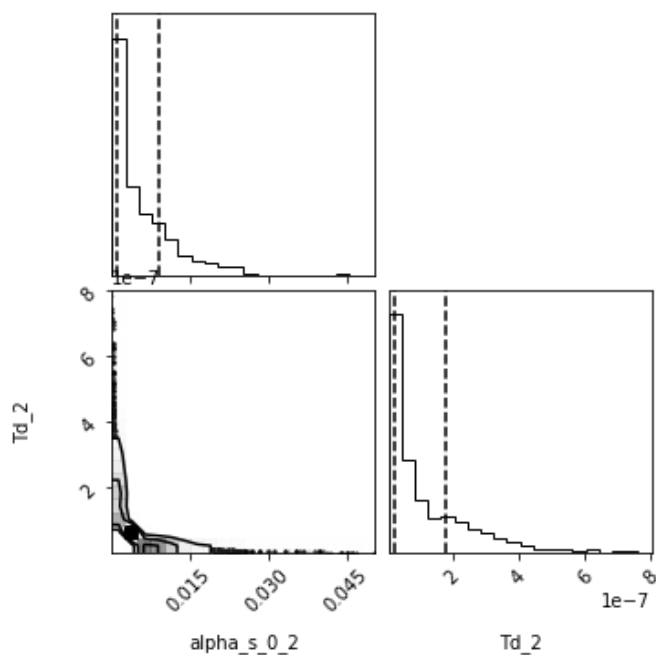

Figure S1. A corner plot derived from the MCMC sampling procedure simultaneously varying the surface accommodation coefficient of ozone ( $\alpha_{s_0_2}$ , component 2) and the surface desorption lifetime of ozone ( $Td_2$ , component 2) described in the main text. Inter-quartile ranges are denoted by dashed lines.

There is a range of possible parameter combinations consistent with the experimental data (Fig. S1). The lack of a gaussian “blob” in the corner plot indicates that these two parameters are highly correlated and that one (or ideally, both) should be constrained.

## S2. Reaction scheme and table of parameters used for KM-SUB and KM-GAP case study 1

The reaction scheme used for both KM-SUB and KM-GAP models is as follows (component numbers employed in MultilayerPy are in square brackets):

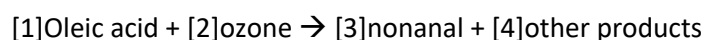

| Parameter name | Description                                                          | Parameter value [bounds]                                  |
|----------------|----------------------------------------------------------------------|-----------------------------------------------------------|
| Db_1           | Bulk diffusion coefficient of oleic acid (component 1)               | $10^{-10} \text{ cm}^2 \text{ s}^{-1}$                    |
| Db_2           | Bulk diffusion coefficient of ozone (component 2)                    | $10^{-5} \text{ cm}^2 \text{ s}^{-1}$                     |
| Db_3           | Bulk diffusion coefficient of products (component 3)                 | $10^{-10} \text{ cm}^2 \text{ s}^{-1}$                    |
| T              | Temperature                                                          | 298 K                                                     |
| delta_1        | Molecular diameter of oleic acid (component 1)                       | 0.8 nm                                                    |
| delta_2        | Molecular diameter of ozone (component 2)                            | 0.4 nm                                                    |
| delta_3        | Molecular diameter of products (component 3)                         | 0.4 nm                                                    |
| k_1_2          | Bulk reaction rate coefficient for oleic acid reacting with ozone    | $1.7 \times 10^{-15} \text{ cm}^3 \text{ s}^{-1}$         |
| k_1_2_surf     | Surface reaction rate coefficient for oleic acid reacting with ozone | $6 \times 10^{-12} \text{ cm}^2 \text{ s}^{-1}$           |
| Xgs_2          | Near-surface gas concentration for ozone (component 2)               | $7 \times 10^{13} \text{ cm}^{-3}$                        |
| Td_2           | Surface desorption lifetime of ozone (component 2)                   | 0.02 s                                                    |
| Td_4 (KM-GAP)* | Surface desorption lifetime of nonanal (component 4)                 | 0.1 s [ $10^{-4} - 10^{-1}$ ]                             |
| H_2            | Henry's law coefficient for ozone (component 2)                      | $4.8 \times 10^{-4} \text{ mol cm}^{-3} \text{ atm}^{-1}$ |
| w_2            | Mean thermal velocity of ozone in the gas phase                      | $3.6 \times 10^4 \text{ cm s}^{-1}$                       |
| alpha_s_0_2**  | Surface accommodation coefficient of ozone on a clear surface        | $4.2 \times 10^{-4}$ [ $10^{-4} - 10^{-1}$ ]              |
| p_2            | Vapour pressure of ozone (component 2)                               | $5.7 \times 10^6 \text{ Pa}$                              |
| p_4***         | Vapour pressure of nonanal (component 4)                             | 10 Pa                                                     |

Table S1. Parameters used to run the KM-SUB and KM-GAP models presented in the main text. \*The surface desorption lifetime of all non-volatile components was set to a very large value ( $10^6$  s) in the KM-GAP model. \*\*The optimised value from the KM-GAP model was  $10^{-3}$ . \*\*\*vapour pressures of all other non-volatile components set to 0 in the KM-GAP model.
