# Supplementary material for: MultilayerPy (v1.0): A Python-based framework for building, running and optimising kinetic multi-layer models of aerosols and films
Source: Copernicus journal article supplement (doi:10.5194/egusphere-2022-143), 2022-05-02
Supplement: Supplementary file [file egusphere-2022-143-AC1-supplement.zip]

**Supporting information for “MultilayerPy (v1.0): A Python-based framework for building, running and optimising kinetic multi-layer models of aerosols and films”**

Adam Milsom, Adam M. Squires and Christian Pfrang.

**S1. Parameter correlation**

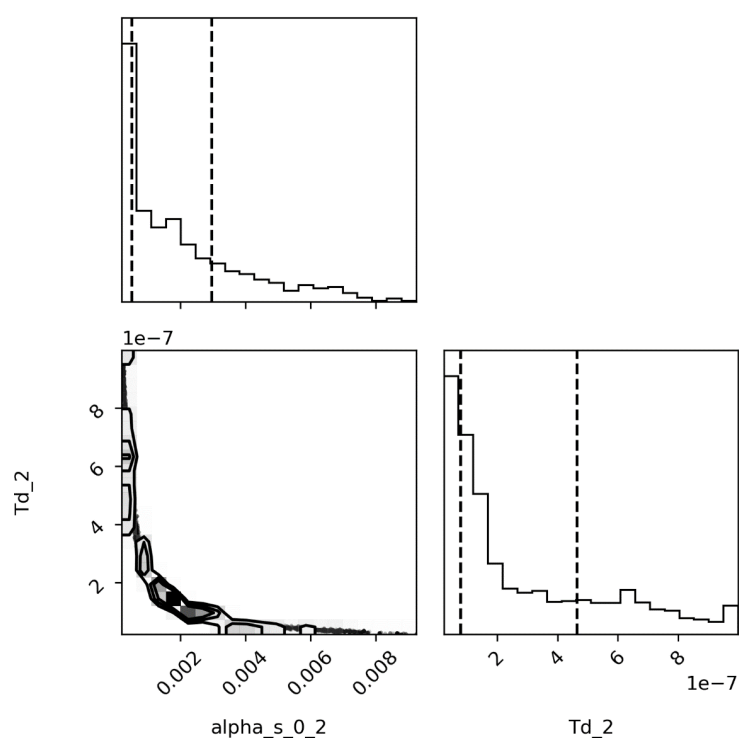

Figure S1. A corner plot derived from the MCMC sampling procedure simultaneously varying the surface accommodation coefficient of ozone ( $\alpha_{s_0_2}$ , component 2) and the surface desorption lifetime of ozone ( $Td_2$ , component 2) described in the main text. Inter-quartile ranges are denoted by dashed lines.

There is a range of possible parameter combinations consistent with the experimental data (Fig. S1). The lack of a gaussian “blob” in the corner plot indicates that these two parameters are highly correlated and that one (or ideally, both) should be constrained.

S2. Reaction scheme and table of parameters used for KM-SUB and KM-GAP case study 1

The reaction scheme used for both KM-SUB and KM-GAP models is as follows (component numbers employed in MultilayerPy are in square brackets):

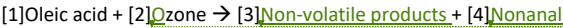

- Deleted: o
- Deleted: nonanal
- Deleted: other products

| Parameter name | Description                                                          | Parameter value [bounds]                                  |
|----------------|----------------------------------------------------------------------|-----------------------------------------------------------|
| Db_1           | Bulk diffusion coefficient of oleic acid (component 1)               | $10^{-10} \text{ cm}^2 \text{ s}^{-1}$                    |
| Db_2           | Bulk diffusion coefficient of ozone (component 2)                    | $10^{-5} \text{ cm}^2 \text{ s}^{-1}$                     |
| Db_3           | Bulk diffusion coefficient of products (component 3)                 | $10^{-10} \text{ cm}^2 \text{ s}^{-1}$                    |
| T              | Temperature                                                          | 298 K                                                     |
| delta_1        | Molecular diameter of oleic acid (component 1)                       | $0.8 \times 10^{-7} \text{ cm}$                           |
| delta_2        | Molecular diameter of ozone (component 2)                            | $0.4 \times 10^{-7} \text{ cm}$                           |
| delta_3        | Molecular diameter of products (component 3)                         | $0.4 \times 10^{-7} \text{ cm}$                           |
| k_1_2          | Bulk reaction rate coefficient for oleic acid reacting with ozone    | $1.7 \times 10^{-15} \text{ cm}^3 \text{ s}^{-1}$         |
| k_1_2_surf     | Surface reaction rate coefficient for oleic acid reacting with ozone | $6 \times 10^{12} \text{ cm}^2 \text{ s}^{-1}$            |
| Xgs_2          | Near-surface gas concentration for ozone (component 2)               | $7 \times 10^{13} \text{ cm}^{-3}$                        |
| Td_2           | Surface desorption lifetime of ozone (component 2)                   | 0.02 s                                                    |
| Td_4 (KM-GAP)* | Surface desorption lifetime of nonanal (component 4)                 | 0.1 s [ $10^{-4} - 10^{-1}$ ]                             |
| H_2            | Henry's law coefficient for ozone (component 2)                      | $4.8 \times 10^{-4} \text{ mol cm}^{-3} \text{ atm}^{-1}$ |
| w_2            | Mean thermal velocity of ozone in the gas phase                      | $3.6 \times 10^4 \text{ cm s}^{-1}$                       |
| alpha_s_0_2**  | Surface accommodation coefficient of ozone on a clear surface        | $4.2 \times 10^{-4}$ [ $10^{-4} - 10^{-1}$ ]              |
| p_2            | Vapour pressure of ozone (component 2)                               | $5.7 \times 10^6 \text{ Pa}$                              |
| p_4***         | Vapour pressure of nonanal (component 4)                             | 10 Pa                                                     |

- Deleted: n
- Deleted: nm
- Deleted: nm

Table S1. Parameters used to run the KM-SUB and KM-GAP models presented in the main text. \*The surface desorption lifetime of all non-volatile components was set to a very large value ( $10^6 \text{ s}$ ) in the KM-GAP model. \*\*The optimised value from the KM-GAP model was  $10^{-3}$ . \*\*\*vapour pressures of all other non-volatile components set to 0 in the KM-GAP model.
